# Supplementary material for: Association between preoperative autonomic nervous system function and post-induction hypotension in elderly patients: a protocol for a cohort study
Source: HighWire-hosted journal article supplement (doi:10.1136/bmjopen-2022-067400), 2023-01-01
Supplement: bmjopen-2022-067400supp001_data_supplement.pdf [file bmjopen-2022-067400supp001_data_supplement.pdf]

Blood biochemistry test: Alb ( ) Cr(E) ( ) Other abnormality\_\_\_\_\_

## Preoperative monitoring (LiDCO)

|                | Baseline | Passive leg raising | Deep slow breathing (1min) | End |
|----------------|----------|---------------------|----------------------------|-----|
| Time           |          |                     |                            |     |
| Heart Rate     |          |                     |                            |     |
| Blood pressure |          |                     |                            |     |
| Note           |          | $\Delta SV = \%$    |                            |     |

## Intraoperative Record

| Time |                    | SBP | DBP | MAP | HR | SpO <sub>2</sub> |             |      |     |     |
|------|--------------------|-----|-----|-----|----|------------------|-------------|------|-----|-----|
|      | Baseline           |     |     |     |    |                  | Vasopressor | Note | MAC | BIS |
|      | Start of induction |     |     |     |    |                  |             |      |     |     |
|      | 2min               |     |     |     |    |                  |             |      |     |     |
|      | 4min               |     |     |     |    |                  |             |      |     |     |
|      | 6min               |     |     |     |    |                  |             |      |     |     |
|      |                    |     |     |     |    |                  |             |      |     |     |
|      |                    |     |     |     |    |                  |             |      |     |     |
|      |                    |     |     |     |    |                  |             |      |     |     |
|      | Intubation /0min   |     |     |     |    |                  |             |      |     |     |
|      | 2min               |     |     |     |    |                  |             |      |     |     |
|      | 4min               |     |     |     |    |                  |             |      |     |     |
|      | 6min               |     |     |     |    |                  |             |      |     |     |
|      | 8min               |     |     |     |    |                  |             |      |     |     |
|      | 10min              |     |     |     |    |                  |             |      |     |     |
|      | 12min              |     |     |     |    |                  |             |      |     |     |
|      | 14min              |     |     |     |    |                  |             |      |     |     |
|      | 16min              |     |     |     |    |                  |             |      |     |     |
|      | 18min              |     |     |     |    |                  |             |      |     |     |
|      | 20min              |     |     |     |    |                  |             |      |     |     |
|      |                    |     |     |     |    |                  |             |      |     |     |
|      |                    |     |     |     |    |                  |             |      |     |     |
|      |                    |     |     |     |    |                  |             |      |     |     |
|      | Incision /0min     |     |     |     |    |                  |             |      |     |     |
|      | +3min              |     |     |     |    |                  |             |      |     |     |
|      | +6min              |     |     |     |    |                  |             |      |     |     |

|                                  |                                                                                                                                                                                                  |                    |       |  |  |  |  |  |  |  |
|----------------------------------|--------------------------------------------------------------------------------------------------------------------------------------------------------------------------------------------------|--------------------|-------|--|--|--|--|--|--|--|
|                                  | +9min                                                                                                                                                                                            |                    |       |  |  |  |  |  |  |  |
|                                  | +12min                                                                                                                                                                                           |                    |       |  |  |  |  |  |  |  |
|                                  | +15min                                                                                                                                                                                           |                    |       |  |  |  |  |  |  |  |
|                                  | +18min                                                                                                                                                                                           |                    |       |  |  |  |  |  |  |  |
|                                  | +21min                                                                                                                                                                                           |                    |       |  |  |  |  |  |  |  |
|                                  | +24min                                                                                                                                                                                           |                    |       |  |  |  |  |  |  |  |
|                                  | +27min                                                                                                                                                                                           |                    |       |  |  |  |  |  |  |  |
|                                  | +30min                                                                                                                                                                                           |                    |       |  |  |  |  |  |  |  |
|                                  |                                                                                                                                                                                                  |                    |       |  |  |  |  |  |  |  |
|                                  | End of surgery                                                                                                                                                                                   |                    |       |  |  |  |  |  |  |  |
| PIH                              | 1 Yes <input type="checkbox"/> 1 <input type="checkbox"/> SBP<90mmHg; 12 <input type="checkbox"/> MAP<65mmHg; 13 <input type="checkbox"/> MAP decline≥30%Baseline; 0 No <input type="checkbox"/> |                    |       |  |  |  |  |  |  |  |
| Early Intraoperative hypotension | 1 Yes <input type="checkbox"/> 1 <input type="checkbox"/> SBP<90mmHg; 12 <input type="checkbox"/> MAP<65mmHg; 13 <input type="checkbox"/> MAP decline≥30%Baseline; 0 No <input type="checkbox"/> |                    |       |  |  |  |  |  |  |  |
| Drugs                            | Induction dosing                                                                                                                                                                                 | Maintenance dosing | Total |  |  |  |  |  |  |  |
| Sevoflurane                      | /                                                                                                                                                                                                | MAC:               | /     |  |  |  |  |  |  |  |
| Propofol                         |                                                                                                                                                                                                  |                    |       |  |  |  |  |  |  |  |
| Etomidate                        |                                                                                                                                                                                                  |                    |       |  |  |  |  |  |  |  |
| Dexmedetomidine                  |                                                                                                                                                                                                  |                    |       |  |  |  |  |  |  |  |
| Midazolam                        |                                                                                                                                                                                                  |                    |       |  |  |  |  |  |  |  |
| Fentanyl                         |                                                                                                                                                                                                  |                    |       |  |  |  |  |  |  |  |
| Remifentanyl                     |                                                                                                                                                                                                  |                    |       |  |  |  |  |  |  |  |
| Oxycodone                        |                                                                                                                                                                                                  |                    |       |  |  |  |  |  |  |  |
| Rocuronium                       |                                                                                                                                                                                                  |                    |       |  |  |  |  |  |  |  |
| Lidocaine                        |                                                                                                                                                                                                  |                    |       |  |  |  |  |  |  |  |
| Ephedrine                        |                                                                                                                                                                                                  |                    |       |  |  |  |  |  |  |  |
| Phenylephrine                    |                                                                                                                                                                                                  |                    |       |  |  |  |  |  |  |  |
| Atropine                         |                                                                                                                                                                                                  |                    |       |  |  |  |  |  |  |  |
| Norepinephrine                   |                                                                                                                                                                                                  |                    |       |  |  |  |  |  |  |  |
| Epinephrine                      |                                                                                                                                                                                                  |                    |       |  |  |  |  |  |  |  |
| Esmolol                          |                                                                                                                                                                                                  |                    |       |  |  |  |  |  |  |  |
| Urapidil                         |                                                                                                                                                                                                  |                    |       |  |  |  |  |  |  |  |
| Others                           |                                                                                                                                                                                                  |                    |       |  |  |  |  |  |  |  |

|                 |  |                 |  |
|-----------------|--|-----------------|--|
| Date of surgery |  | Name of surgery |  |
|-----------------|--|-----------------|--|

|                                  |                                                                                                                                                                                                                                                                                                    |
|----------------------------------|----------------------------------------------------------------------------------------------------------------------------------------------------------------------------------------------------------------------------------------------------------------------------------------------------|
| Combined nerve block             | <input type="checkbox"/> Yes <input type="checkbox"/> No                                                                                                                                                                                                                                           |
| Output volume                    | Urine _____ml; Blood loss _____ml<br>Others _____ml                                                                                                                                                                                                                                                |
| Transfusion volume               | Crystalloid fluid _____ml; Colloid fluid _____ml                                                                                                                                                                                                                                                   |
| Intraoperative blood transfusion | <input type="checkbox"/> Yes<br><input type="checkbox"/> Whole blood _____ml <input type="checkbox"/> RBC_____U<br><input type="checkbox"/> Platelet _____U<br><input type="checkbox"/> Fresh frozen plasma ____ml <input type="checkbox"/> Autotransfusion _____ml<br><input type="checkbox"/> No |
| Operation time                   |                                                                                                                                                                                                                                                                                                    |
| Aneasthesia time                 |                                                                                                                                                                                                                                                                                                    |
| Duration of stay in PACU         | _____min<br>Event:<br>Rescue medications: <input type="checkbox"/> NSAIDs <input type="checkbox"/> Opioids <input type="checkbox"/> Ondansetron <input type="checkbox"/> Others                                                                                                                    |
| Stay in ICU                      | <input type="checkbox"/> Yes<br>Mechanical ventilation time _____ h<br>ICU staying time _____h<br><input type="checkbox"/> No                                                                                                                                                                      |

**Postoperative complications (within 30 days)**

|                                                                                                                                                                                                                                                                                                                                                                                                                                |                                                                                                                                                                                                                                                                                                                                                                                                                                                                |
|--------------------------------------------------------------------------------------------------------------------------------------------------------------------------------------------------------------------------------------------------------------------------------------------------------------------------------------------------------------------------------------------------------------------------------|----------------------------------------------------------------------------------------------------------------------------------------------------------------------------------------------------------------------------------------------------------------------------------------------------------------------------------------------------------------------------------------------------------------------------------------------------------------|
| Respiratory system                                                                                                                                                                                                                                                                                                                                                                                                             |                                                                                                                                                                                                                                                                                                                                                                                                                                                                |
| No <input type="checkbox"/> ;                                                                                                                                                                                                                                                                                                                                                                                                  |                                                                                                                                                                                                                                                                                                                                                                                                                                                                |
| Yes <input type="checkbox"/> : <input type="checkbox"/> Mechanical ventilation time $\geq$ 48 小时; <input type="checkbox"/> ARDS; <input type="checkbox"/> Pleural effusion;<br><input type="checkbox"/> Atelectasis; <input type="checkbox"/> Pulmonary infection; <input type="checkbox"/> Pneumothorax; <input type="checkbox"/> Aspiration pneumonia; <input type="checkbox"/> PE;<br><input type="checkbox"/> Others _____ |                                                                                                                                                                                                                                                                                                                                                                                                                                                                |
| Cardiovascular system                                                                                                                                                                                                                                                                                                                                                                                                          |                                                                                                                                                                                                                                                                                                                                                                                                                                                                |
| No <input type="checkbox"/> ;                                                                                                                                                                                                                                                                                                                                                                                                  |                                                                                                                                                                                                                                                                                                                                                                                                                                                                |
| Yes <input type="checkbox"/> : <input type="checkbox"/> Non-fatal cardiac arrest; <input type="checkbox"/> ACS; <input type="checkbox"/> Acute congestive heart failure;<br><input type="checkbox"/> Arrhythmias (requiring treatment); <input type="checkbox"/> New-onset hypertension; <input type="checkbox"/> New-onset hypotension; <input type="checkbox"/> Others _____                                                 |                                                                                                                                                                                                                                                                                                                                                                                                                                                                |
| Urinary system                                                                                                                                                                                                                                                                                                                                                                                                                 |                                                                                                                                                                                                                                                                                                                                                                                                                                                                |
| No <input type="checkbox"/> ;                                                                                                                                                                                                                                                                                                                                                                                                  |                                                                                                                                                                                                                                                                                                                                                                                                                                                                |
| Yes <input type="checkbox"/> : <input type="checkbox"/> AKI; <input type="checkbox"/> UTI; <input type="checkbox"/> Acute urinary retention; <input type="checkbox"/> Others _____                                                                                                                                                                                                                                             |                                                                                                                                                                                                                                                                                                                                                                                                                                                                |
| Digestive system                                                                                                                                                                                                                                                                                                                                                                                                               |                                                                                                                                                                                                                                                                                                                                                                                                                                                                |
| No <input type="checkbox"/> ;                                                                                                                                                                                                                                                                                                                                                                                                  |                                                                                                                                                                                                                                                                                                                                                                                                                                                                |
| Yes <input type="checkbox"/> : <input type="checkbox"/> Intestinal obstruction; <input type="checkbox"/> Peritonitis; <input type="checkbox"/> GIB; <input type="checkbox"/> Hepatic dysfunction;<br><input type="checkbox"/> Anastomotic fistula; <input type="checkbox"/> Others _____                                                                                                                                       |                                                                                                                                                                                                                                                                                                                                                                                                                                                                |
| Nervous system                                                                                                                                                                                                                                                                                                                                                                                                                 |                                                                                                                                                                                                                                                                                                                                                                                                                                                                |
| No <input type="checkbox"/> ;                                                                                                                                                                                                                                                                                                                                                                                                  |                                                                                                                                                                                                                                                                                                                                                                                                                                                                |
| Yes <input type="checkbox"/> : <input type="checkbox"/> Ischemic stroke; <input type="checkbox"/> UTI; <input type="checkbox"/> Acute urinary retention;<br><input type="checkbox"/> Others _____                                                                                                                                                                                                                              |                                                                                                                                                                                                                                                                                                                                                                                                                                                                |
| Hematologic system                                                                                                                                                                                                                                                                                                                                                                                                             |                                                                                                                                                                                                                                                                                                                                                                                                                                                                |
| No <input type="checkbox"/> ;                                                                                                                                                                                                                                                                                                                                                                                                  |                                                                                                                                                                                                                                                                                                                                                                                                                                                                |
| Yes <input type="checkbox"/> : <input type="checkbox"/> DVT <input type="checkbox"/> RBC transfusion $\geq$ 4U within 72 hours after surgery;<br><input type="checkbox"/> Others _____                                                                                                                                                                                                                                         |                                                                                                                                                                                                                                                                                                                                                                                                                                                                |
| Infection                                                                                                                                                                                                                                                                                                                                                                                                                      |                                                                                                                                                                                                                                                                                                                                                                                                                                                                |
| No <input type="checkbox"/> ;                                                                                                                                                                                                                                                                                                                                                                                                  |                                                                                                                                                                                                                                                                                                                                                                                                                                                                |
| Yes <input type="checkbox"/> : <input type="checkbox"/> Sepsis; <input type="checkbox"/> Wound infection; <input type="checkbox"/> GIB; <input type="checkbox"/> Others _____                                                                                                                                                                                                                                                  |                                                                                                                                                                                                                                                                                                                                                                                                                                                                |
| Clavien-Dindo classification                                                                                                                                                                                                                                                                                                                                                                                                   |                                                                                                                                                                                                                                                                                                                                                                                                                                                                |
| <input type="checkbox"/> Grade I                                                                                                                                                                                                                                                                                                                                                                                               | Any deviation from the normal postoperative course without the need for pharmacological treatment or surgical, endoscopic or radiological interventions.<br><input type="checkbox"/> anti-emetics <input type="checkbox"/> antipyretics <input type="checkbox"/> analgesics <input type="checkbox"/> diuretics <input type="checkbox"/> electrolytes<br><input type="checkbox"/> physiotherapy <input type="checkbox"/> wound infections opened at the bedside |
| <input type="checkbox"/> Grade II                                                                                                                                                                                                                                                                                                                                                                                              | Requiring pharmacological treatment with drugs other than such allowed for grade I complications.                                                                                                                                                                                                                                                                                                                                                              |
| <input type="checkbox"/> Grade III                                                                                                                                                                                                                                                                                                                                                                                             | Requiring surgical, endoscopic or radiological intervention<br><input type="checkbox"/> IIIa: Not under general anaesthesia; <input type="checkbox"/> IIIb: Under general anaesthesia                                                                                                                                                                                                                                                                          |
| <input type="checkbox"/> Grade IV                                                                                                                                                                                                                                                                                                                                                                                              | Life-threatening complication (including central nervous system complications) requiring critical care.<br><input type="checkbox"/> IVa: Single organ dysfunction (including dialysis); <input type="checkbox"/> IVb: Multi-organ dysfunction                                                                                                                                                                                                                  |
| <input type="checkbox"/> Grade V                                                                                                                                                                                                                                                                                                                                                                                               | Death of a patient.                                                                                                                                                                                                                                                                                                                                                                                                                                            |

|       |                                                                                       |
|-------|---------------------------------------------------------------------------------------|
| Death | No <input type="checkbox"/> ;<br>Yes <input type="checkbox"/> : POD ____ Cause: _____ |
|-------|---------------------------------------------------------------------------------------|
